# Supplementary material for: Correction: Smart Soup, a Traditional Chinese Medicine Formula, Ameliorates Amyloid Pathology and Related Cognitive Deficits
Source: PubMed Central journal article supplement (PMC7398536; doi:10.1371/journal.pone.0237035), 2020-08-03

Figure 2A original images

WT Veh 6E10

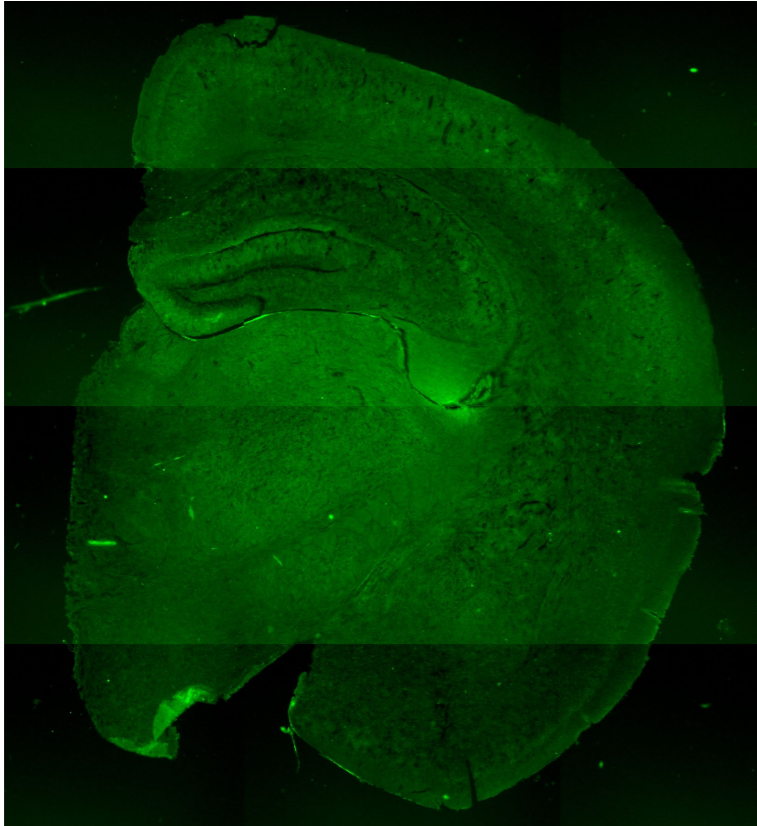

APP/PS1 Veh 6E10

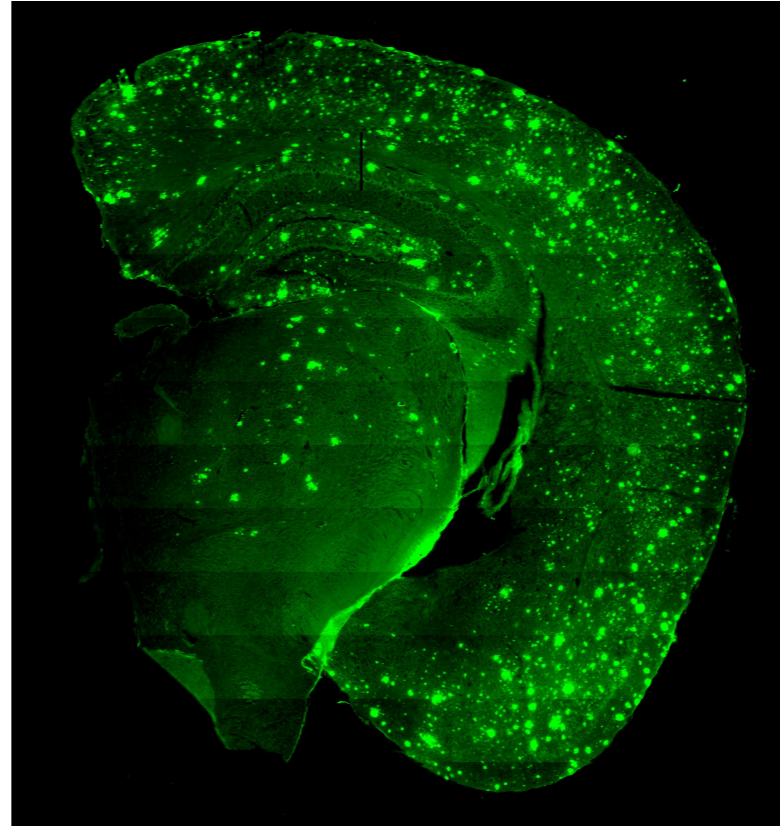

APP/PS1 SS 6E10

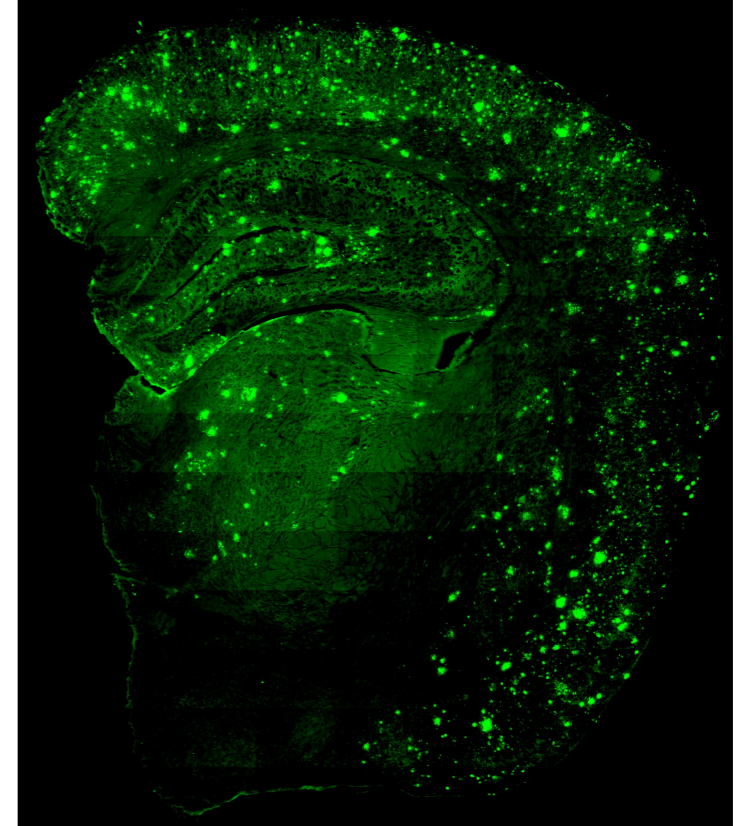

WT Veh GFAP/6E10

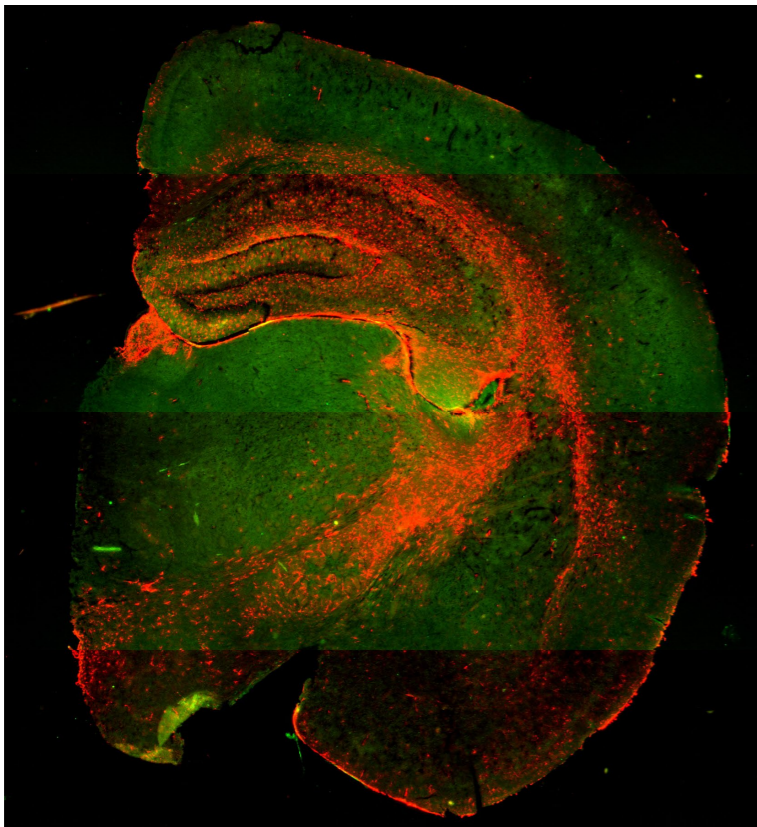

APP/PS1 Veh GFAP/6E10

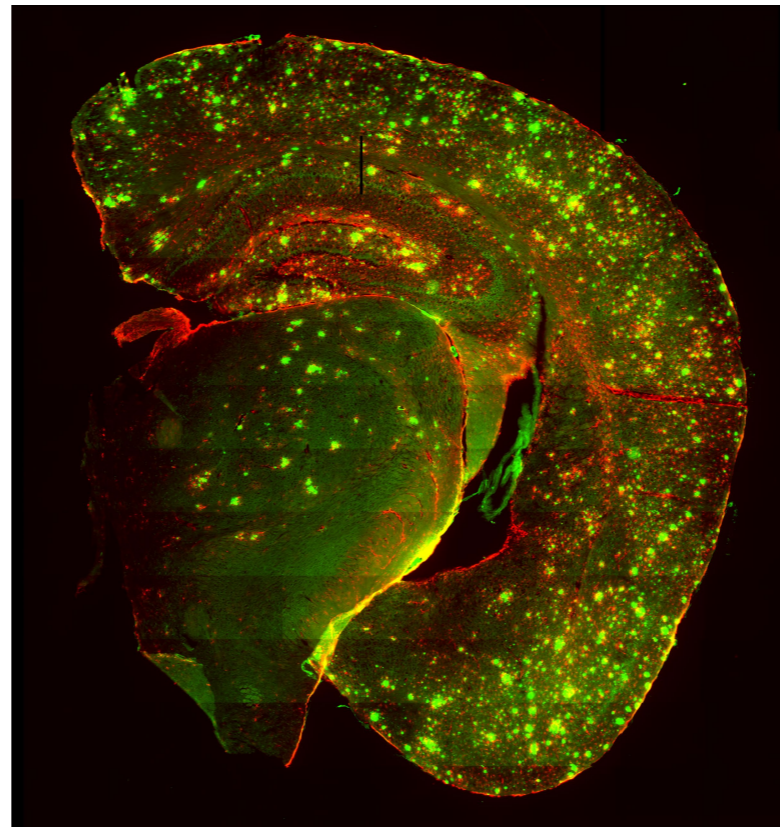

APP/PS1 SS GFAP/6E10

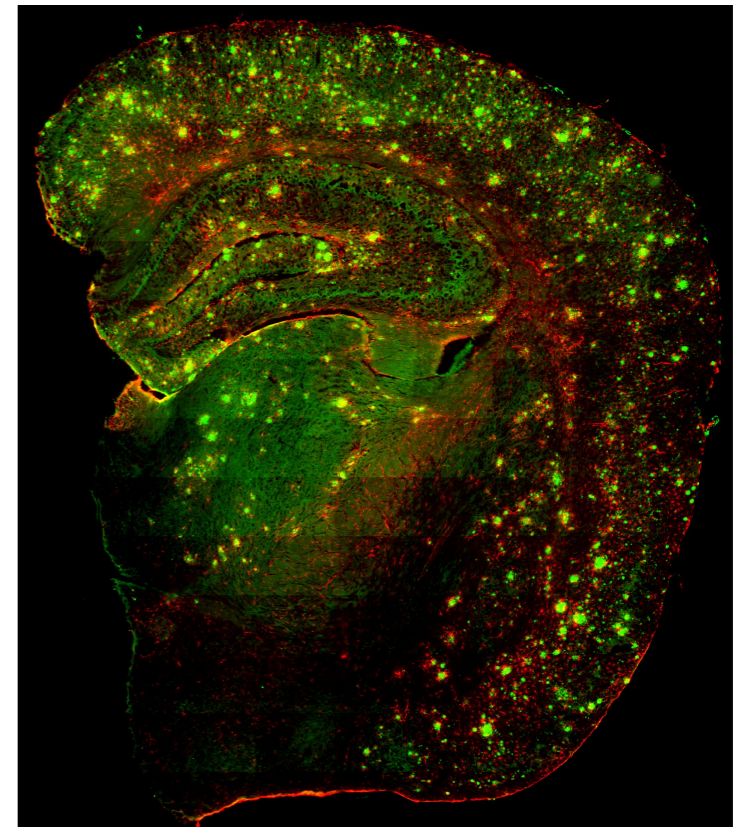

Supplement: pone.0237035.s001.pdf [file pone.0237035.s001.pdf]
